# Supplementary material for: Patidegib in Dermatology: A Current Review
Source: Int J Mol Sci. 2021 Oct 3;22(19):10725. doi: 10.3390/ijms221910725 (PMC8509734; doi:10.3390/ijms221910725)
Supplement: Supplementary file 1 [file ijms-22-10725-s001.zip › ijms-1365130-supplementary.pdf]

**Supplementary Materials**

**Table S1.** Case report and series not present on ClinicalTrials.gov reporting phase I trials results (Abbreviations: BCC; basal cell carcinoma).

| Publication title<br>(author)                                                                                     | Drug<br>evaluated                 | Sample size<br>and disease<br>staging              | Study results                                                                                           |
|-------------------------------------------------------------------------------------------------------------------|-----------------------------------|----------------------------------------------------|---------------------------------------------------------------------------------------------------------|
| Phase I Study of the Hedgehog Pathway Inhibitor IPI-926 in Adult Patients with Solid Tumors (Jimeno et al.)       | Patidegib 20 mg; 28-day cycles    | 39; stages II, III and IV naïve and not-naïve BCCs | 2 patients achieved complete response; 6 partial response; 2 not-naïve did non experienced any response |
| Patient with Gorlin syndrome and metastatic basal cell carcinoma refractory to smoothened inhibitors (Zhu et al.) | Patidegib 130mg/die for 16 months | 1; stage IV not-naïve BCC                          | Cutaneous BCC responded, while metastatic disease progressed                                            |

**Table S2.** Completed trials reporting results for patidegib use in basal cell carcinomas.

| Official Title on<br>ClinicalTrials.gov or<br>publication title                                                                                                                                                                                             | Phase | Sample size                                                          | Study results                                                                                                                                                                                  |
|-------------------------------------------------------------------------------------------------------------------------------------------------------------------------------------------------------------------------------------------------------------|-------|----------------------------------------------------------------------|------------------------------------------------------------------------------------------------------------------------------------------------------------------------------------------------|
| Double-Blind, Randomized,<br>Vehicle-Controlled Proof of<br>Concept Clinical Trial of<br>Patidegib Gel 2%, 4%, and<br>Vehicle to Decrease the<br>Number of Surgically<br>Eligible Basal Cell<br>Carcinomas in Gorlin<br>Syndrome Patients (NCT<br>02762084) | II    | 17 participants;<br><br>Randomized<br><br>Parallel<br><br>Assignment | Twice daily; 26 weeks:<br><br>- patidegib 2% gel 51.29%<br>clinical and 53.83%<br>molecular reduction;<br><br>- patidegib 4% gel 26.63%<br>clinical and 20.69%<br>molecular reduction          |
| Double-Blind, Dose<br>Escalating, Randomized,<br>Vehicle-Controlled Proof of<br>Concept Clinical Trial of<br>Patidegib Gel 2%, 4%, and<br>Vehicle Applied Once or<br>Twice Daily to Decrease the                                                            | II    | 36 participants;<br><br>Randomized<br><br>Parallel<br><br>Assignment | Patidegib 2% gel once daily<br>for 12 weeks: 56.15% clinical<br>and 56.3% molecular<br>reduction;<br><br>Patidegib 4% gel twice daily<br>for 12 weeks: 18.41% clinical<br>and 28.85% molecular |

---

GLI1 Biomarker in Sporadic

reduction

Nodular Basal Cell

Carcinomas (NCT 02828111)

---

**Table S3.** Ongoing trials regarding patidegib use in basal cell carcinomas. Study results are still not available (Abbreviations: BCC; basal cell carcinoma).

| Official Title on ClinicalTrials.gov or publication title                                                                                                                                                                                                                                   | Phase | Drug evaluated   | Sample size                                 |
|---------------------------------------------------------------------------------------------------------------------------------------------------------------------------------------------------------------------------------------------------------------------------------------------|-------|------------------|---------------------------------------------|
| A Multicenter, Randomized, Double Blind, Vehicle-controlled, Phase 2 Efficacy and Safety Study of Patidegib Topical Gel, 2%, for the Reduction of Disease Burden of Persistently Developing Basal Cell Carcinomas in Patients With Non-Gorlin High Frequency BCC (NCT 04155190; recruiting) | II    | Patidegib 2% gel | 45 patients; Randomized Parallel Assignment |
| A Phase 3, Multicenter, Open-Label Extension Study of Patidegib Topical Gel, 2% in Subjects With Gorlin Syndrome (Basal Cell Nevus Syndrome) (NCT 04308395; enrolling by invitation)                                                                                                        | III   | Patidegib 2% gel | 191 patients; Single Group Assignment       |
| A Multicenter, Randomized, Double-blind, Vehicle-controlled, Phase 3 Efficacy and Safety Study of Patidegib Topical Gel, 2%, for the Reduction of Disease Burden of Persistently                                                                                                            | III   | Patidegib 2% gel | 174 patients; Randomized Parallel           |

|                                              |           |
|----------------------------------------------|-----------|
| Developing Basal Cell Carcinomas (BCCs) in   | Assignmen |
| Subjects With Basal Cell Nevus Syndrome (NCT | t         |
| 03703310; active, not recruiting)            |           |

**Figure legends.**

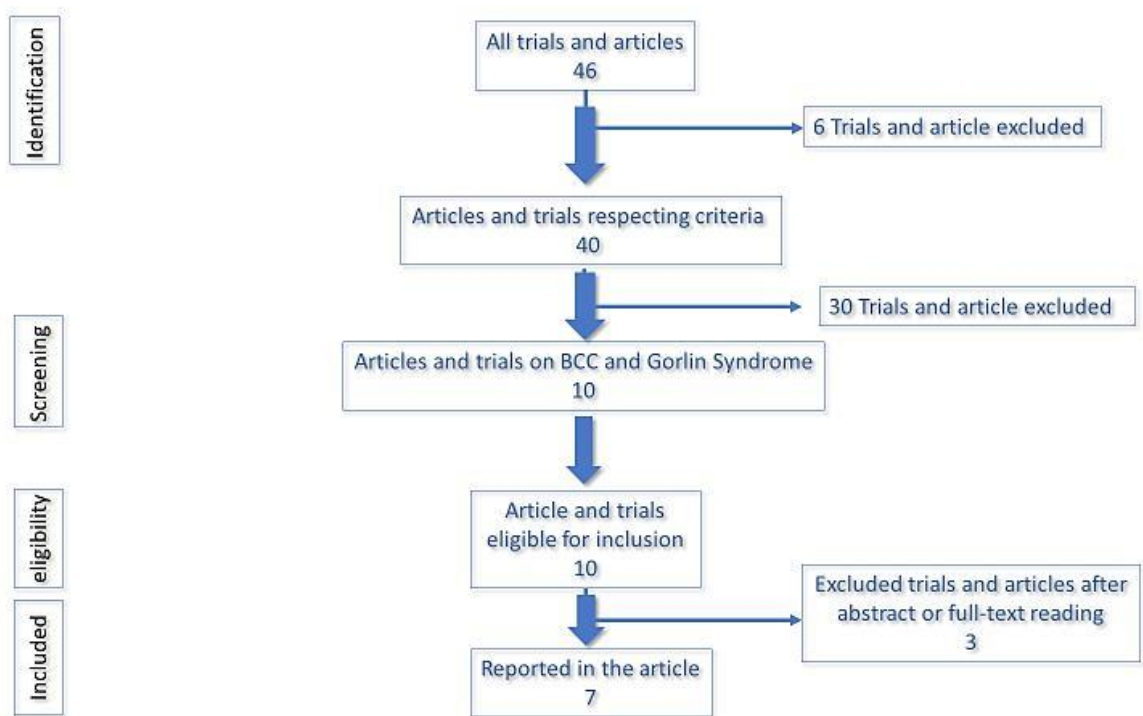

Figure S1. Flowchart summarizing the research strategy to select clinical trials and articles about patidegib use in basal cell carcinomas (Abbreviations: BCC; basal cell carcinoma).
